# Supplementary material
Source: Springer Nature journal article supplement (https://www.springermedizin.de/resource/supplementary/13002_2009_143_MOESM1_ESM.pdf/9627248)
Supplement: MOESM1 [file 9627248]

Inventory of Traditional Herbal Plants Used by the Yi People

| Scientific Name                                                   | Family Name      | Local Name  | Life Form               | Parts Used  | Medicinal Uses                                        | Preparing Methods                                                       |
|-------------------------------------------------------------------|------------------|-------------|-------------------------|-------------|-------------------------------------------------------|-------------------------------------------------------------------------|
| <i>Acanthopanax trifoliatum</i> Merr.                             | Araliaceae       | baqiluosai  | Shrub                   | Root        | Rheumatoid arthritis, jaundice, wound, fever          | New: decoction with (without) radish piece                              |
| <i>Achyranthes aspera</i> L.                                      | Amaranthaceae    | ninajiezai  | Annual or biennial herb | Root        | Irregular menstruation, gonorrhea                     | Decoction                                                               |
| <i>Aesculus chinensis</i> Bunge.                                  | Hippocastanaceae | peizou      | Deciduous arbor         | Bark        | Stomachache, toothache                                | New: decoction with (without) <i>Achyranthes aspera</i> L.              |
| <i>Agapetes lacei</i> Craib                                       | Ericaceae        | faluoxi     | Evergreen shrub         | Root        | Wound, stomachache, hepatitis, edema                  | Decoction with (without) <i>Foeniculum vulgare</i> roots                |
| <i>Agrimonia zeylanica</i> Moon.                                  | Rosaceae         | eshiyema    | Perennial herb          | Whole plant | Migraine, blood problem                               | Decoction with (without) <i>Caesalpinia sappan</i>                      |
| <i>Ainsliaea latifolia</i> var. <i>obovata</i> Grier. et Lauener. | Compositae       | peibuluo    | Perennial herb          | Whole plant | New: high fever (children)                            | New: soaking in alcohol                                                 |
| <i>Ainsliaea yunnanensis</i> Franch.                              | Compositae       | ruoluwa     | Perennial herb          | Whole plant | Joint problems, wound, fracture<br>New: madness       | Decoction with alcohol                                                  |
| <i>Ajuga decumbens</i> Thunb.                                     | Labiatae         | wubonuo     | Perennial herb          | Whole plant | Trachitis, wound, madness, gonorrhea                  | Making juice for external using;<br>New: decoction with (without) sugar |
| <i>Albizzia kalkora</i> Prain.                                    | Mimosaceae       | qiaosaimilu | Deciduous arbor         | Flower      | Rheumatic arthritis, fracture, sleeplessness          | New: decoction with (without) <i>Foeniculum vulgare</i> roots           |
| <i>Allium tuberosum</i> Roxb.                                     | Liliaceae        | ci'abo      | Perennial herb          | Root, leaf  | Wound, dysentery, regurgitate                         | Making juice and drinking or for external using                         |
| <i>Ampelopsis delavayana</i> Planch.                              | Vitaceae         | yaonübei    | Deciduous climbing      | Root        | Wound, fracture, rheumatic arthritis                  | Decoction with (without) <i>Tetragium hypoglaucum</i>                   |
| <i>Anemone rivularis</i> Buch-Ham.                                | Ranunculaceae    | aimulieshi  | Perennial herb          | Whole plant | Amygdalitis, chronic hepatitis, stomachache, swelling | Soaking in alcohol;<br>New: making juice or power                       |
| <i>Anisodus acutangulus</i> C.Y. Wu et C. Chen                    | Solanaceae       | lejuecai    | Perennial herb          | Root, leaf  | New: stomachache, wound, fracture                     | New: decoction                                                          |

|                                                    |                  |                   |                              |                        |                                                            |                                                                                             |
|----------------------------------------------------|------------------|-------------------|------------------------------|------------------------|------------------------------------------------------------|---------------------------------------------------------------------------------------------|
| <i>Apium graveolens</i> L.var.<br><i>dulce</i> DC. | Umbelliferae     | nedaimu           | Perennial<br>cultivated herb | Whole plant            | Wind syndrome of head                                      | New: decoction; or making power with<br><i>Allium tuberosum</i>                             |
| <i>Aquilaria sinensis</i> Gilg.                    | Thymelaeaceae    | liwaziwa          | Evergreen<br>arbor           | Bark                   | Emesia, asthma;<br>New: constipation                       | Making powder and drinking;<br>New: decoction with <i>Amomum tsao-kuo</i>                   |
| <i>Aristolochia calcicola</i> C.Y.<br>Wu           | Aristolochiaceae | hannuonaci        | Ligneous liana               | Root                   | Hypertension, cold;<br>New: snakebite                      | New: making powder with <i>Heracleum<br/>lanatum</i>                                        |
| <i>Artemisia apiacea</i> Hance                     | Compositae       | shiwubai          | Annual herb                  | Whole plant            | Nephritis, cold, diarrhea, enteritis                       | Decoction with (without) <i>Laggera<br/>pterodonta</i>                                      |
| <i>Artemisia japonica</i> Thunb.                   | Compositae       | erkeyika          | Perennial herb               | Whole plant            | Bacillary phthisis, Hypertension,<br>mouth cavity problems | New: decoction with (without) <i>Myriactis<br/>delavayi</i>                                 |
| <i>Aspidistra elatior</i> Blume                    | Liliaceae        | sheluojie         | Perennial<br>evergreen       | Whole plant            | Cough, wound, fracture, bellyache                          | Decoction or soaking in alcohol                                                             |
| <i>Bauhinia faberi</i> Oliver.                     | Caesalpiniaceae  | peimili           | Little shrub                 | Root, leaf             | Neurosis, wound                                            | Decoction with roots (or roots and stems)                                                   |
| <i>Begonia yunnanensis</i> Levl                    | Begoniaceae      | baikaiheitang     | Perennial herb               | Whole plant            | Irregular menstruation,<br>stomachache, wound, emesia      | New: decoction with soup of sour pickles                                                    |
| <i>Bidens bipinnata</i> L.                         | Compositae       | nenshi            | Annual herb                  | Whole plant            | Dysentery, wound, fever                                    | New: pounding into pulp for the external<br>application, decoction with <i>Dendranthema</i> |
| <i>Boehmeria nivea</i> Gaud.                       | Urticaceae       | jimabai           | Perennial<br>sub-fruticose   | Root                   | Abortion, cold, edema caused by<br>Nephritis, wound        | Decoction with lotus and yam                                                                |
| <i>Buddleia officinalis</i> Maxim.                 | Loganiaceae      | weizhongzen<br>uo | Shrub                        | Root, leaf,<br>flowers | Cough, eye problems; New:<br>hepatitis, asthma,            | New: decoction (making primer with<br>alcohol) stewing leaf with eggs                       |
| <i>Cacalia palmatisecta</i> Hand-<br>Mazz.         | Compositae       | luohua            | Perennial herb               | Whole plant            | Common cold, Cough, wound                                  | Decoction                                                                                   |
| <i>Campylotropis trigonoclada</i><br>Schneid.      | Papilionaceae    | songlouzhen<br>g  | Little shrub                 | Root                   | Gonorrhoea, edema, wound                                   | New: decoction with <i>Ainsliaea latifolia</i> var.<br><i>obovata</i>                       |
| <i>Carpesium cernuum</i> L.                        | Compositae       | nuobatijiedu<br>o | Perennial herb               | Whole plant            | Cold, toothache, dysentery<br>New: rhachitis               | New: decoction with (without)<br><i>Cynoglossum lanceolatum</i>                             |
| <i>Cassia obtusifolia</i> L.                       | Caesalpiniaceae  | zandoujian        | Annual<br>sub-fruticose      | Seed                   | Ceratitis, hypertension,<br>stomachache, headache          | Decoction (for external using)                                                              |

|                                                |                 |               |                          |             |                                                                |                                                                                 |
|------------------------------------------------|-----------------|---------------|--------------------------|-------------|----------------------------------------------------------------|---------------------------------------------------------------------------------|
| <i>Chenopodium ambrosioides</i> L.             | Chenopodiaceae  | binise        | Annual or perennial herb | Whole plant | Cold, ancylostomiasis, nematodiasis, eczema,                   | New: making pellets with sugar and <i>Setaria italica</i>                       |
| <i>Chrysanthemum indicum</i> L.                | Compositae      | chidou'oudou  | Perennial herb           | Whole plant | Cold, hypertension, gastritis and enteritis, eczema, anthracia | Decoction and drinking; making juice (for external using)                       |
| <i>Clematis obtusidentata</i> Hjeichler        | Ranunculaceae   | yuwuli        | Liana                    | Whole plant | Cystitis, urethritis                                           | Decoction                                                                       |
| <i>Clematis pterae</i> Hand-Mazz.              | Ranunculaceae   | nimohuangshi  | Perennial evergreen      | Root, stem  | Edema, palmus                                                  | Decoction with meat and <i>Adenophora bulleyana</i>                             |
| <i>Clerodendrum bungei</i> Steud.              | Verbenaceae     | xichiji       | Deciduous shrub          | Whole plant | Hernia, leukorrhea, hypertension, hemorrhoid                   | New: decoction with the roots of <i>Toona ciliata</i>                           |
| <i>Clerodendrum petasites</i> Moore            | Verbenaceae     | maiheiao      | Shrub                    | Leaf        | Wound, hepatitis, sore throat, bronchitis                      | Decoction with sugar                                                            |
| <i>Conyza blinii</i> Lévl.                     | Compositae      | jiqiaoshi     | Annual herb              | Whole plant | Amygdalitis, nephritis, toothache, chronic bronchitis          | Decoction with honey or brown sugar                                             |
| <i>Conyza japonica</i> Less.                   | Compositae      | heibainongshi | Annual or biennial herb  | Whole plant | Eczema, amygdalitis, laryngitis, alveolysis                    | Decoction<br>New: gargle with medicine water                                    |
| <i>Corydalis edulis</i> Maxim.                 | Papaveraceae    | benzhiduoqi   | Annual herb              | Root        | Bacillary phthisis, sore throat, otitis media                  | Stewing with pig's knuckles                                                     |
| <i>Corydalis thalictrifolia</i> Franch.        | Papaveraceae    | wazimoci      | Perennial herb           | Whole plant | Hemorrhoid, stomachache                                        | Decoction with alcohol; or making powder for external using                     |
| <i>Crepis napifera</i> Bab.                    | Compositae      | talawa        | Perennial herb           | Root        | Stomachache, bronchitis, cough, wound                          | New: making powder after removed the bubble                                     |
| <i>Cryptolepis buchananii</i> Roem. et Schult. | Asclepiadaceae  | aqina         | Liana                    | Root        | Wound, fracture, stomachache                                   | Decoction; or soaking in alcohol                                                |
| <i>Cucubalus baccifer</i> L.                   | Caryophyllaceae | kahousi       | Perennial herb           | Whole plant | Wound, fracture, hernia, edema, bacillary phthisis             | pounding into pulp for external using; or soaking in alcohol                    |
| <i>Cuscuta chinensis</i> Lam.                  | Cuscutaceae     | menyishi      | Annual autoecious        | Whole plant | Leukorrhea, eczema, hepatitis                                  | Decoction with honey or brown sugar                                             |
| <i>Cynanchum amplexicaule</i> Hemsl.           | Asclepiadaceae  | nuopeinuoci   | Perennial herb           | Root        | Eczema, enteritis, irregular menstruation                      | Making powder (taking in alcohol)<br>New: taking juice which squeeze roots with |

|                                                    |                |                    |                              |             |                                                             |                                                                                             |
|----------------------------------------------------|----------------|--------------------|------------------------------|-------------|-------------------------------------------------------------|---------------------------------------------------------------------------------------------|
| <i>Cynanchum otophyllum</i><br>Schneid.            | Asclepiadaceae | roujiboqi          | Perennial<br>herbal liana    | Root        | Wound, stomachache, madness,<br>sonitus, epilepsy           | Decoction with meat; or soaking in alcohol                                                  |
| <i>Cynodon dactylon</i> Pers.                      | Gramineae      | momozalabai        | Perennial herb               | Whole plant | Wound, toothache, hepatitis;<br>New: dysentery              | Pounding into pulp for external application<br>New: stewing with pork and <i>Adenophora</i> |
| <i>Cynoglossum lanceolatum</i><br>Forsk.           | Boraginaceae   | anudeniang         | Herb                         | Root        | Irregular menstruation, cystitis                            | Decoction                                                                                   |
| <i>Dactylicapnos scandens</i><br>Hutch.            | Papaveraceae   | wugeinü            | Perennial<br>herbal liana    | Root        | Pains, wound;<br>New: dysentery                             | Decoction or powder (internal use); or<br>soaking in alcohol                                |
| <i>Daphne feddei</i> Lévl.                         | Thymelaeaceae  | aluobaluoji        | Evergreen<br>shrub           | Whole plant | Wound, rheumatoid arthritis,<br>stomachache                 | Making pellet or powder, decoction with<br>honey                                            |
| <i>Desmodium microphyllum</i><br>DC.               | Papilionaceae  | mindexiong         | Perennial<br>creepy herb     | Whole plant | Menstruation problems,<br>dysentery                         | Decoction with (without) <i>Gaultheria<br/>yunnanensis</i> and brown sugar                  |
| <i>Dichrocephala benthamii</i> C.<br>B. Clarke.    | Compositae     | womidu             | Annual herb                  | Whole plant | Stomachache, mouth problems                                 | Decoction<br>New: squeeze juice with alcohol for                                            |
| <i>Didymocarpus yunnanensis</i><br>C. E. C. Fisch. | Gesneriaceae   | sinuoqi            | Perennial herb               | Whole plant | Wound, cough, fracture                                      | Stewing with alcohol, making powder (for<br>external using)                                 |
| <i>Diospyros mollifolia</i> Rehd<br>et Wils.       | Ebenaceae      | seyili             | Evergreen<br>shrub or little | Fruit, leaf | Chronic diarrhea, dyspepsia<br>(child)                      | Decoction with <i>Crataegus pinnatifida</i>                                                 |
| <i>Disporum cantoniensis</i><br>Merr.              | Orchidaceae    | chenshan           | Perennial herb               | Root        | Menstruation problem<br>New: bacillary phthisis             | Decoction with eggs                                                                         |
| <i>Duchesnea indica</i> Focke.                     | Rosaceae       | shelici            | Perennial herb               | Whole plant | Irregular menstruation, snake<br>bites                      | Pounding into pulp the external application<br>New: decoction with alcohol and brown        |
| <i>Eria pannea</i> Lindl.                          | Orchidaceae    | luoduo             | Perennial<br>adnascent       | Whole plant | Wound, fracture, medicinal<br>poisoning, chronic bronchitis | Decoction with big red ginseng                                                              |
| <i>Eriosema chinense</i> Vogel.                    | Papilionaceae  | qubenjing          | Herb                         | Root        | Liver and Lung problems                                     | Decoction with sugar or honey                                                               |
| <i>Euonymus japonicus</i><br>Thunb.                | Celastraceae   | houbaikeben<br>shi | Evergreen<br>shrub or ardor  | Root        | Irregular menstruation                                      | Stewing with meat                                                                           |
| <i>Evodia lepta</i> Merr.                          | Rutaceae       | shaochaoshi<br>ka  | Deciduous<br>shrub or little | Whole plant | Rheumatoid arthritis, skin<br>problems, eczema              | Decoction                                                                                   |

|                                         |               |                      |                        |             |                                                       |                                                                            |
|-----------------------------------------|---------------|----------------------|------------------------|-------------|-------------------------------------------------------|----------------------------------------------------------------------------|
| <i>Excoecaria acerifolia</i> Fdidr.     | Euphorbiaceae | jinni                | Evergreen little arbor | Whole plant | Toothache, jaundice, cough                            | Decoction                                                                  |
| <i>Gaultheria yunnanensis</i> Rehd.     | Ericaceae     | jiemaixiong          | Evergreen shrub        | Whole plant | Wound, toothache, eczema                              | Decoction (for internal using or for external using)                       |
| <i>Gerbera anandria</i> Sch.-Bip.       | Compositae    | baiyibeiding         | Perennial herb         | Root        | Toothache, blood loss                                 | Decoction with <i>Epaltes australis</i>                                    |
| <i>Girardinia palmata</i> Gaud.         | Urticaceae    | ajiyan               | Perennial herb         | Whole plant | Edema, skin itch                                      | Stewing with herb of maidenhair and pig's foot                             |
| <i>Gynura segetum</i> Merr.             | Compositae    | nianggemmo           | Perennial herb         | Whole plant | Menstruation problems, wound, rheumatics              | Decoction, squeeze juice (boiled water medicine)                           |
| <i>Hedyotis pinifolia</i> Wall.         | Rubiaceae     | niangjiebowo         | Annual herb            | Whole plant | Palmus, wound<br>New: ahypnia                         | Decoction with (without) buffalo's horn powder                             |
| <i>Helicia erratica</i> Hook. f.        | Proteaceae    | mitaile              | Evergreen arbor        | Root        | Dyspepsia, enteritis, food poison, dysentery          | Decoction with brown sugar                                                 |
| <i>Hemerocallis plicata</i> Stapf.      | Liliaceae     | guangyinshixing      | Perennial herb         | Root        | Lung problems, stomachache                            | New: stewing with eggs                                                     |
| <i>Houttuynia cordata</i> Thunb.        | Saururaceae   | chaci'a              | Perennial herb         | Whole plant | Eczema, hemorrhoid;<br>New: hepatitis                 | Decoction with brown sugar                                                 |
| <i>Hydrocotyle sibthorpioides</i> Lam.  | Umbelliferae  | zebaiwa              | Perennial creopy herb  | Whole plant | Icteric hepatitis, cough, amygdalitis, eyes problems; | Decoction with (without) <i>Artemisia capillaris</i>                       |
| <i>Hypericum patulum</i> Thunb.         | Hypercaceae   | Yizhiqiaji yizhitaji | Half-evergreen shrub   | Whole plant | Dog bites<br>New: snake bites                         | With root of <i>Vigna cylindrica</i> pounding into pulp for external using |
| <i>Indigofera mengtseana</i> Craib      | Papilionaceae | gedugaduo            | Sub-shrub              | Root        | Mastitis, joint pain, rheumatism, leprosy             | Decoction with <i>Tetrastigma hypoglaucum</i>                              |
| <i>Indigofera pseudotinctoria</i> Mats. | Papilionaceae | kuchuxi              | Sub-shrub              | Whole plant | Amygdalitis, hemorrhoid, cold and cough               | Decoction<br>New: stewing with mixed pork                                  |
| <i>Inula cappa</i> DC.                  | Compositae    | nitusai              | Perennial herb         | Whole plant | Chronic nephritis, hemorrhoid, cholecystitis          | Decoction (for external using)                                             |
| <i>Knoxia valerianoides</i> Thorel      | Rubiaceae     | Shidao               | Perennial herb         | Root        | Edema, hemophthisis;<br>New: ahypnia                  | New: soaking in akohol                                                     |

|                                                            |                |                   |                           |             |                                                              |                                                                                              |
|------------------------------------------------------------|----------------|-------------------|---------------------------|-------------|--------------------------------------------------------------|----------------------------------------------------------------------------------------------|
| <i>Lemma minor</i> L.                                      | Lemnaceae      | yiwei             | Hydrophytic little herb   | Whole plant | Skin problems, edema                                         | New: decoction with black bean                                                               |
| <i>Leycesteria taiwanensis</i> Wall                        | Caprifoliaceae | panjiangtuo       | Deciduous shrub           | Whole plant | Cystitis, edema, hemorrhoid, hepatitis, fracture             | New: stewing with hen and <i>Anemone cathayensis</i> roots                                   |
| <i>Litsea euosma</i> W. W. Smith.                          | Lauraceae      | shisuo            | Deciduous little arbor    | Whole plant | Dyspepsia, stomachache, wound                                | Decoction with fruits of <i>Crataegus pinnatifida</i> , pericarp of <i>Citrus madurensis</i> |
| <i>Loxostigma griffithii</i> Clarke.                       | Gesneriaceae   | zuini             | Perennial herb            | Whole plant | Wound, dyspepsia, influenza                                  | Decoction                                                                                    |
| <i>Lycopodium complanatum</i> L.                           | Lycopodiaceae  | yizhea            | Perennial herb            | Whole plant | Fracture, wound<br>New: edema                                | Decoction or soaking in alcohol                                                              |
| <i>Malva verticillata</i> L.                               | Malvaceae      | si'aobaobaop<br>a | Perennial herb            | Whole plant | Irregular menstruation; New: ahypnia, hematuria              | New: stewing with pork                                                                       |
| <i>Marsdenia tenacissima</i> Weight et Arm.                | Asclepiadaceae | adazai            | Deciduous ligneous liana  | Whole plant | Bronchitis                                                   | Decoction                                                                                    |
| <i>Munronia henryi</i> Harms.                              | Meliaceae      | lilutu            | Dwarfish sub-shrub        | Whole plant | Rheumatoid arthritis, stomachache, cold;                     | Decoction or soaking in alcohol                                                              |
| <i>Murraya paniculata</i> Jack.                            | Rutaceae       | bennaxi           | Evergreen shrub or little | Root, leaf  | Hepatitis, stomachache, wound                                | New: making powder with <i>Zanthoxylum simulans</i> leaf                                     |
| <i>Paederia scandens</i> Merr.                             | Rubiaceae      | keqiliegu         | Perennial herbal liana    | Whole plant | Irregular menstruation                                       | Decoction                                                                                    |
| <i>Paris polyphylla</i> var. <i>yunnanense</i> Hand.-Mazz. | Trilliaceae    | niupalie          | Perennial herb            | Rhizome     | Traumatism, wound, toothache, snake bite, arthritis, malaria | Decoction for oral-taking, grind powder for external or oral use                             |
| <i>Patrinia scabiosaeifolia</i> Fisch ex Link.             | Valerianaceae  | sheweilong        | Perennial herb            | Whole plant | Schizophrenia, enteritis                                     | New: decoction with <i>Lonicera japonica</i> flowers                                         |
| <i>Pholidota articulata</i> Lindl                          | Orchidaceae    | feidoululie'er    | Perennial adnascent       | Whole plant | Headache, Cough, leucorrhea                                  | Soaking in alcohol                                                                           |
| <i>Pholidota chinensis</i> Lindl                           | Orchidaceae    | gushangye         | Perennial herb            | Whole plant | Wound, fracture                                              | Making the formula or for external using                                                     |
| <i>Photinia parvifolia</i> Schneid                         | Rosaceae       | nianggenipa       | Deciduous little arbor    | Whole plant | Toothache, jaundice, wound                                   | Decoction or making the formula for external using                                           |

|                                             |                |                    |                           |             |                                                                     |                                                                     |
|---------------------------------------------|----------------|--------------------|---------------------------|-------------|---------------------------------------------------------------------|---------------------------------------------------------------------|
| <i>Phryma leptostachya</i> L.               | Phrymataceae   | zibai              | Perennial herb            | Whole plant | Eczema, wound, fracture                                             | Decoction or stewing with pork                                      |
| <i>Pimpinella candolleana</i> Wight et Arn. | Umbelliferae   | yanruopame<br>nhou | Perennial herb            | Whole plant | Cough, cold, stomachache,<br>dyspepsia                              | Decoction or powder, soaking in alcohol                             |
| <i>Pinellia cordata</i> N. E. Brown.        | Araceae        | beiga              | Perennial herb            | Tuber       | Stomachache, wound;<br>New: headache                                | Making capsule covered with other medicine                          |
| <i>Piper hancei</i> Maxim.                  | Piperaceae     | hannuonaci         | Ligneous liana            | Whole plant | Rheumatic arthritis, wound,<br>toothache                            | soaking in alcohol                                                  |
| <i>Pittosporum daphniphyloides</i> Hayata.  | Pittosporaceae | peimei             | Ardor                     | Fruit, bark | Wound, dysentery, hypertension                                      | Decoction                                                           |
| <i>Pleione yunnanensis</i> Rolfe.           | Orchidaceae    | zinoqu             | Perennial herb            | Root        | Cough, bacillary phthisis                                           | New: making powder with honey                                       |
| <i>Plumbago zeylanica</i> L.                | Plumbaginaceae | yushu              | Climbing<br>sub-shrub     | Root, leaf  | Rheumatoid arthritis                                                | Decoction or soaking in alcohol                                     |
| <i>Polygala arillata</i> Buch.-Ham.         | Polygalaceae   | Yajie              | Shrub                     | Root        | Bacillary phthisis, lung problems,<br>irregular menstruation, wound | Decoction or stewing with lean meat                                 |
| <i>Polygala tatarinowii</i> Regel.          | Polygalaceae   | wuwumo             | Annual herb               | Root        | Palmus, bronchitis, wound;<br>New: ahypnia                          | Decoction;<br>New: stewing with lean meat                           |
| <i>Polygonum cymosum</i> Trev.              | Polygonaceae   | eluomo             | Perennial herb            | Root        | Diarrhea, stomachache, wound,<br>dysentery, irregular menstruation  | Decoction                                                           |
| <i>Polygonum denticulatum</i> Huang         | Polygonaceae   | nianyanqi          | Perennial<br>herbal liana | Root        | Chronic hepatitis, dyspepsia,<br>asthma, dysentery                  | Decoction or powder                                                 |
| <i>Pyracantha fortuneana</i> Li             | Rosaceae       | maizhesai          | Shrub or ardor            | Whole plant | Dysentery; New: leucorrhea,<br>irregular menstruation               | Making the formula                                                  |
| <i>Quercus mongolica</i> Fisch.             | Fagaceae       | bomio              | Deciduous<br>ardor        | Root, bark  | Poisoning, dyspepsia,<br>hemorrhoid, jaundice                       | New: Decoction with the roots and bark of<br><i>Populus bonatii</i> |
| <i>Ranunculus ternatus</i> Thunb.           | Ranunculaceae  | anaishi            | Perennial herb            | Root        | Bacillary phthisis                                                  | Making medicated plaster                                            |
| <i>Reineckea carnea</i> Kunth.              | Liliaceae      | tuosipian          | Perennial<br>evergreen    | Whole plant | Rheumatic arthritis, asthma,<br>wound, fracture, irregular          | Decoction or stewing with lean meat                                 |

|                                                             |              |                    |                              |                   |                                                                 |                                                                      |
|-------------------------------------------------------------|--------------|--------------------|------------------------------|-------------------|-----------------------------------------------------------------|----------------------------------------------------------------------|
| <i>Rhodiola henryi</i> Fu                                   | Crassulaceae | haisainai          | Perennial herb               | Whole plant       | Wound, fracture, laryngitis, dysentery                          | Soaking <i>Dactylicapnos scandens</i> in alcohol                     |
| <i>Rubus ellipticus</i> Smith var. <i>obcordatus</i> Focke. | Rosaceae     | jiejiesairuo       | Evergreen shrub              | Root              | Amygdalitis, toothache, dysentery, icteric hepatitis,           | Decoction;<br>New: soaking in alcohol                                |
| <i>Rubus xanthocarpus</i> Bur. et Franch.                   | Rosaceae     | chuxu              | Sub-fruticose perennial herb | Whole plant       | Dysentery                                                       | Decoction                                                            |
| <i>Rumex nepalensis</i> Spreng.                             | Polygonaceae | apeiaji            | Perennial herb               | Root              | Constipation, parotitis, wound, dysentery, jaundice             | New: decoction with (without) <i>Acanthopanax gracilistylus</i> bark |
| <i>Salix babylonica</i> L.                                  | Salicaceae   | yu'ela             | Deciduous arbor              | Branch, root must | Gonorrhea, infective hepatitis                                  | Decoction with <i>Glycyrrhiza uralensis</i> rhizome                  |
| <i>Schefflera venulosa</i> Hams.                            | Araliaceae   | peizuo             | Evergreen little arbor       | Whole plant       | Stomachache, arthritis, wound, neuralgia                        | Decoction with (without) <i>Clematis</i> stems                       |
| <i>Sedum multicaule</i> Wall.                               | Crassulaceae | niupianwei         | Fleshy herb                  | Whole plant       | Laryngitis, wound, hypertension                                 | Decoction, pounding into pulp for external using                     |
| <i>Smilax mairei</i> Lévl.                                  | Liliaceae    | tongduo nainengruo | Evergreen climbing           | Root              | Rheumatic arthritis, chronic gastritis, irregular menstruation, | New: decoction with <i>Lagopsis supina</i>                           |
| <i>Solanum khasianum</i> C. B Clarke.                       | Solanaceae   | Taopaishenze       | Perennial herb               | Whole plant       | Stomachache, toothache, headache, wound, parotitis, cough       | Decoction                                                            |
| <i>Swertia patens</i> Burkill                               | Gentianaceae | luoruke            | Perennial herb               | Whole plant       | Dyspepsia (kid), hepatitis                                      | Decoction                                                            |
| <i>Tetragium hypoglaucum</i> Cump.                          | Vitaceae     | yuewuji            | Twining herbal liana         | Whole plant       | Wound, bacillary phthisis                                       | Decoction or soaking in alcohol                                      |
| <i>Toona sinensis</i> Roem.                                 | Meliaceae    | genuze             | Deciduous arbor              | Root skin         | Dysentery                                                       | Decoction or making formula                                          |
| <i>Tripterygium hypoglaucum</i> Hutch.                      | Celastraceae | yigumeiban         | Deciduous rampant shrub      | Root skin         | Eczema, wound;<br>New: bronchitis                               | Decoction<br>New: soaking in alcohol                                 |
